# Supplementary material
Source: PubMed Central journal article supplement (PMC4470857)
Supplement: NIHMS675364-supplement-6.pdf [file NIHMS675364-supplement-6.pdf]

**Supplementary Table 1. RNAi used in the study.**

| <b>RNAi</b> | <b>Target</b>          | <b>Sequence</b>               | <b>Source</b>                         |
|-------------|------------------------|-------------------------------|---------------------------------------|
| siRNA       | human scramble Control | GGGCAAGACGAGCGGGAAG           | Thermo Scientific (Custom)            |
| siRNA       | human TAZ              | siGENOME WWTR1 siRNA#1,2,4    | Thermo Scientific (MQ-016083-00-0002) |
| siRNA       | human YAP              | siGENOME YAP1 siRNA siRNA#1-4 | Thermo Scientific (MQ-012200-00-0002) |
| siRNA       | human TAZ/YAP          | UGUGGAUGAGAUGGAUACA           | Thermo Scientific (Custom)            |
| shRNA       | human scramble Control | GGGCAAGACGAGCGGGAAG           | Hiemer et al. JBC, 2014 (Ref 18)      |
| shRNA       | human TAZ              | GCGATGAATCAGCCTCTGAAT         | Hiemer et al. JBC, 2014 (Ref 18)      |
| shRNA       | human YAP              | CTGGTCAGAGATACTTCTTAA         | Zhao et al Genes Dev. 2008 (Ref 8)    |
