# Supplementary material
Source: PubMed Central journal article supplement (PMC4470857)
Supplement: NIHMS675364-supplement-7.pdf [file NIHMS675364-supplement-7.pdf]

**Supplementary Table 2. Antibodies used in the study.**

| <b>Specificity</b>               | <b>Source</b>               | <b>Catalog No</b> | <b>Application (Concentration)</b> |
|----------------------------------|-----------------------------|-------------------|------------------------------------|
| rabbit anti-YAP [EP1674Y]        | Abcam                       | ab52771           | IF (1:500), WB (1:1000)            |
| goat anti-mouse 488 Alexa Fluor  | Molecular Probes            | A-11001           | IF (1:500)                         |
| goat anti-rabbit 555 Alexa Fluor | Molecular Probes            | A-21428           | IF (1:500)                         |
| rabbit anti-phospho127 YAP       | Cell Signaling              | 4911              | WB (1:1000)                        |
| rabbit anti-YAP/TAZ              | Cell Signaling              | 8418              | WB (1:1000)                        |
| anti-FLAG HRP conjugate          | Sigma                       | A8592             | WB (1:10000)                       |
| rabbit anti-GAPDH                | Sigma-Aldrich               | G9545             | WB (1:10000)                       |
| anti-rabbit IgG HRP conjugate    | GE Healthcare Life Sciences | NA934             | WB (1:10000)                       |
| anti-mouse IgG HRP conjugate     | GE Healthcare Life Sciences | NA931             | WB (1:10000)                       |
