# Supplementary material
Source: PubMed Central journal article supplement (PMC4470857)
Supplement: NIHMS675364-supplement-8.pdf [file NIHMS675364-supplement-8.pdf]

**Supplementary Table 3. qPCR primers used in the study.**

| <b>Target</b> | <b>Forward</b>           | <b>Reverse</b>          |
|---------------|--------------------------|-------------------------|
| human TAZ     | CCATCACTAATAATAGCTCAGATC | GTGATTACAGCCAGGTTAGAAAG |
| human YAP     | CTCGAACCCCAGATGACTTC     | CCAGGAATGGCTTCAAGGTA    |
| human GAPDH   | AATCCCATCACCATCTTCCA     | TGGACTCCACGACGTACTCA    |
| human CCNE2   | TCACTGATGGTGCTTGCAGT     | GCCAGGAGATGATTGTTACAGGA |
| human CDK2    | CCTGAAATCCTCCTGGGCTG     | CCCAGAGTCCGAAAGATCCG    |
| human CDC6    | GTTCGCAAAGCACTGGATGT     | GACCAACCCTCTTGGGAATCA   |
| human PCNA    | CACTCCACTCTCTTCAACGGT    | TCATCCTCGATCTTGGGAGC    |
| human AURKA   | CACCCAAAAGAGCAAGCAGC     | CCCAGAGGGCGACCAATTT     |
| human PLK4    | GCTGATAGACCACCCTCACC     | GCTGTACAAACCTGGAAGCA    |
| human BIRC5   | AGCCAGATGACGACCCCAT      | TGACAGAAAGGAAAGCGCAA    |
| human TEAD1   | GATGATGCTGGGGCTTTTTTA    | AGGAGCAAACCTTTGGTGGAA   |
| human TEAD4   | TTGCCAGGCCAAGCCGGAAC     | CGGGCCCTGCAGGAGACTCA    |
| human ETS1    | TTACTCAGCGCCTCGTCCT      | CCAAAAGGGGTAGCAAGGTC    |
| human JUN     | CCAAGAACTCGGACCTCCTC     | CCCGTTGCTGGACTGGATTA    |
| human PBX3    | AATTCGCCCACCACACCAAA     | GTGATTGCACATTGGCTCCG    |
| human RUNX2   | CTCCCTGAACTCTGCACCAA     | CGTCATCTGGCTCAGGTAGG    |
| human SOX9    | ACCCGCACTTGCACAACG       | CCCGTTCTTCACCGACTTCCTC  |
